# Supplementary material for: Multilocus sequence typing, biochemical and antibiotic resistance characterizations reveal diversity of North American strains of the honey bee pathogen Paenibacillus larvae
Source: PubMed Central journal article supplement (PMC5415181; doi:10.1371/journal.pone.0176831), 2017-05-03
Supplement: pone.0176831.s001.pdf [file pone.0176831.s001.pdf]

**S1 Table. Origins and typing data of *Paenibacillus larvae* strains analyzed in this study (1999-2013).**

| No | USDA Code#             | geographical origin | Sources               | Year | ST | ERIC |
|----|------------------------|---------------------|-----------------------|------|----|------|
| 1  | BRL230035              | MD                  | Scales                | 2003 | 1  | I    |
| 2  | BRL2011-30             | MI                  | Scales                | 2011 | 1  | I    |
| 3  | BRL230282              | SD                  | Scales                | 2003 | 1  | I    |
| 4  | BRL230042              | MS                  | Scales                | 2003 | 1  | I    |
| 5  | BRL230006              | MN                  | Scales                | 2003 | 7  | I    |
| 6  | BRL280163              | UT                  | Scales                | 2008 | 1  | I    |
| 7  | BRL250016              | NJ                  | Scales                | 2005 | 8  | I    |
| 8  | BRL240041              | WI                  | Scales                | 2004 | 1  | I    |
| 9  | BRL260037              | IL                  | Scales                | 2006 | 1  | I    |
| 10 | BRL270100              | WV                  | Scales                | 2007 | 1  | I    |
| 11 | BRL270081              | NS                  | Scales                | 2007 | 1  | I    |
| 12 | BRL260562              | CT                  | Scales                | 2006 | 1  | I    |
| 13 | BRL991122              | CA                  | Scales                | 1999 | 14 | I    |
| 14 | BRL991121              | TN                  | Scales                | 1999 | 15 | I    |
| 15 | BRL270005              | NS                  | Scales                | 2007 | 15 | I    |
| 16 | BRL5137                | GA                  | Scales                | 2013 | 1  | I    |
| 17 | BRL260120              | NY                  | Scales                | 2006 | 9  | I    |
| 18 | BRL270044              | IN                  | Scales                | 2007 | 10 | I    |
| 19 | BRL270406              | CO                  | Scales                | 2007 | 10 | I    |
| 20 | BRL270006              | NM                  | Scales                | 2007 | 1  | I    |
| 21 | BRL260108              | KY                  | Scales                | 2006 | 1  | I    |
| 22 | BRL270015              | NS                  | Scales                | 2007 | 1  | I    |
| 23 | BRL250057              | AK                  | Scales                | 2005 | 11 | I    |
| 24 | BRL270269              | NC                  | Scales                | 2007 | 12 | I    |
| 25 | BRL280079              | OH                  | Scales                | 2008 | 1  | I    |
| 26 | BRL232                 | IA                  | Scales                | 2010 | 1  | I    |
| 27 | BRL230041              | VA                  | Scales                | 2003 | 13 | I    |
| 28 | BRL991123              | WA                  | Scales                | 1999 | 1  | I    |
| 29 | BRL280268              | IA                  | Scales                | 2008 | 1  | I    |
| 30 | BRL250031              | ME                  | Scales                | 2005 | 1  | I    |
| 31 | BRL270007              | MI                  | Scales                | 2007 | 1  | I    |
| 32 | BRL5136                | NY                  | Scales                | 2013 | 1  | I    |
| 33 | BL2524                 | HI                  | Scales                | 2013 | 1  | I    |
| 34 | ATCC9545 <sup>†</sup>  |                     | Received as a culture |      | 2  | I    |
| 35 | ATCC49843 <sup>†</sup> |                     | Received as a culture |      | 3  | IV   |
| 36 | LMG16247 <sup>†</sup>  |                     | Received as a culture |      | 5  | IV   |
| 37 | LMG16252 <sup>†</sup>  |                     | Received as a culture |      | 6  | III  |
| 38 | 233/00                 |                     | Received as a culture |      | 4  | II   |

<sup>†</sup> Reference strains
