# Supplementary material for: Multilocus sequence typing, biochemical and antibiotic resistance characterizations reveal diversity of North American strains of the honey bee pathogen Paenibacillus larvae
Source: PubMed Central journal article supplement (PMC5415181; doi:10.1371/journal.pone.0176831), 2017-05-03
Supplement: pone.0176831.s002.pdf [file pone.0176831.s002.pdf]

**S2 Table. Other MLST primers of *Paenibacillus larvae* were tested and showed no diversity within the target sequences.**

| <b>Primers</b> | <b>Sequence (5'-&gt;3')</b> | <b>Gene product</b>                           | <b>Product length (bp)</b> | <b>Tm (°C)</b> | <b>%GC</b> |
|----------------|-----------------------------|-----------------------------------------------|----------------------------|----------------|------------|
| rpoB_F         | CTTTGCCTCATACGGGCCAT        | rpoB DNA-directed RNA polymerase subunit beta | 692                        | 60.47          | 55.00      |
| rpoB_R         | TCTCCGCATCCGTACCAAAC        |                                               |                            | 60.11          | 55.00      |
| adk_F          | TGCAGGCAAAGGTACACAGG        | Adenylate kinase                              | 564                        | 60.54          | 55.00      |
| adk_R          | TCACCGTTAACCTCTCGCAG        |                                               |                            | 59.76          | 55.00      |
| gmk_F          | TAGCCCACCGACTTTCCAAC        | Guanylate kinase putative                     | 583                        | 59.96          | 55.00      |
| gmk_R          | AGGCATTGCGGACTTCATCA        |                                               |                            | 60.04          | 50.00      |
| aroE_F         | TCTGGG GCTGCCTGTATTTG       | Shikimate dehydrogenase AroE                  | 370                        | 60.03          | 55.00      |
| aroE_R         | GAACCGGAGCTTTTTGGCAG        |                                               |                            | 60.04          | 55.00      |
| arcC_F         | AGCAGACAGTACAGCGACAC        | carbamate kinase ArcC                         | 742                        | 60.04          | 55.00      |
| arcC_R         | TGTAATGATGGTGCCGGCTT        |                                               |                            | 60.03          | 55.00      |
| infB_F         | CGTGATATCGGTGACCTGGG        | Translation initiation factor IF-2            | 654                        | 59.97          | 60.00      |
| infB_R         | GGAGGTGCAAACAACACGTC        |                                               |                            | 59.97          | 55.00      |
