# Supplementary material for: Multilocus sequence typing, biochemical and antibiotic resistance characterizations reveal diversity of North American strains of the honey bee pathogen Paenibacillus larvae
Source: PubMed Central journal article supplement (PMC5415181; doi:10.1371/journal.pone.0176831), 2017-05-03

S2 Fig. BOX PCR genotyping of 38 *Paenibacillus larvae* isolates.

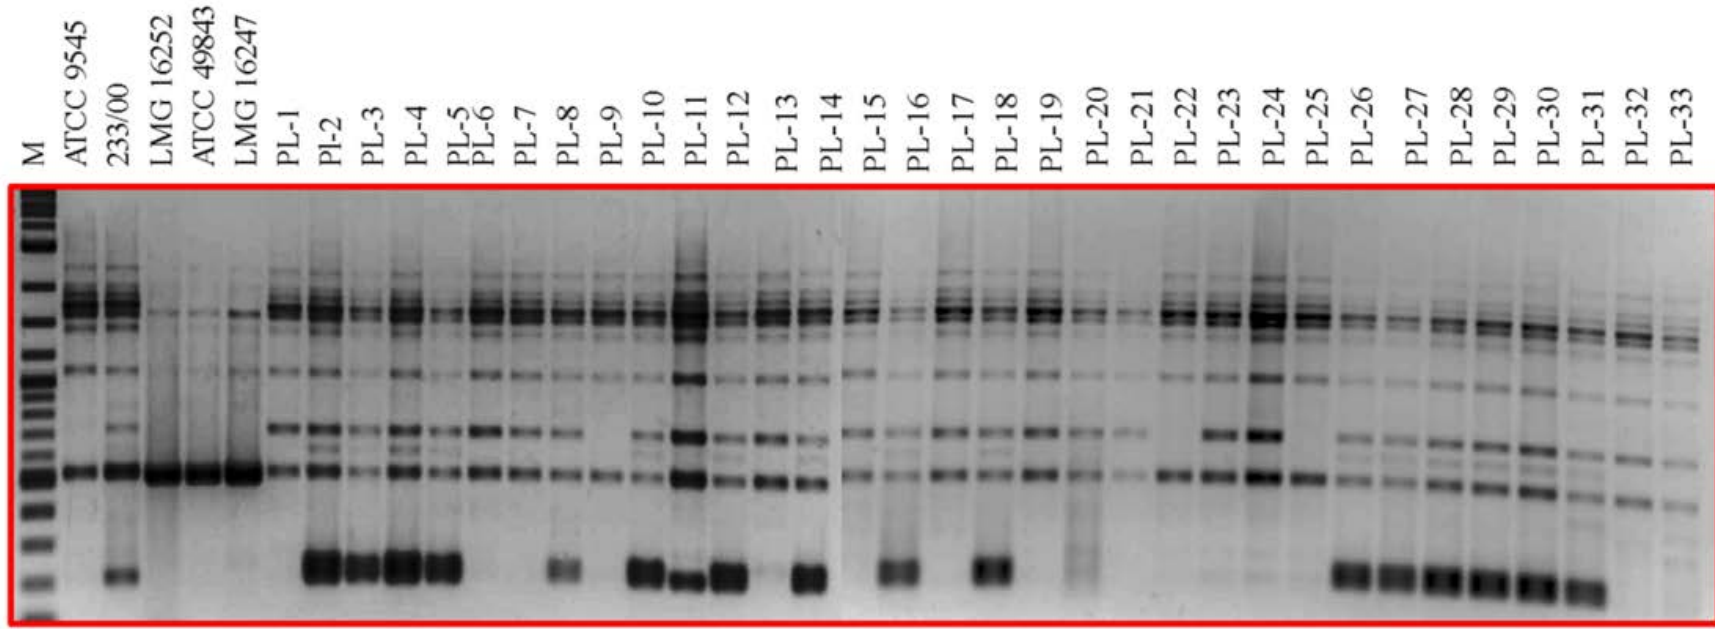

Supplement: pone.0176831.s005.pdf [file pone.0176831.s005.pdf]
