# Supplementary material for: Multilocus sequence typing, biochemical and antibiotic resistance characterizations reveal diversity of North American strains of the honey bee pathogen Paenibacillus larvae
Source: PLoS One. 2017 May 3;12(5):e0176831. doi: 10.1371/journal.pone.0176831 (PMC5415181; doi:10.1371/journal.pone.0176831)
Supplement: S3 Table — (PDF) [file pone.0176831.s003.pdf]

**S3 Table. Biochemistry profiles of *Paenibacillus larvae* by using API® tests.**

| Isolates  | Biochemistry profile    |          |          |          |           |            |           |            |                           |                     |                        |         |           |           |                    |             |        |          |         |            |            |                           |                           |                      |                |                       |               |                     |                    |                     |         |                |                  |                                 |                 |                 |               |               |                            |               |              |  |  |  |
|-----------|-------------------------|----------|----------|----------|-----------|------------|-----------|------------|---------------------------|---------------------|------------------------|---------|-----------|-----------|--------------------|-------------|--------|----------|---------|------------|------------|---------------------------|---------------------------|----------------------|----------------|-----------------------|---------------|---------------------|--------------------|---------------------|---------|----------------|------------------|---------------------------------|-----------------|-----------------|---------------|---------------|----------------------------|---------------|--------------|--|--|--|
|           | Carbohydrate metabolism |          |          |          |           |            |           |            |                           |                     |                        |         |           |           | Enzymatic activity |             |        |          |         |            |            |                           |                           |                      |                |                       |               |                     |                    |                     |         |                |                  |                                 |                 |                 |               |               |                            |               |              |  |  |  |
|           | Glycerol                | D-ribose | D-xylose | L-xylose | D-glucose | D-fructose | D-mannose | D-mannitol | Methyl-αD-Glucopyranoside | N-acetylGlucosamine | ESculin ferric citrate | Salicin | D-maltose | D-Lactose | D-Saccharose       | D-trehalose | AmiDon | Glycogen | Xylitol | D-turanose | D-tagatose | potassium 2-KetoGluconate | potassium 5-KetoGluconate | Alkaline phosphatase | Esterase (C 4) | Esterase Lipase (C 8) | Lipase (C 14) | Leucine arylamidase | Valine arylamidase | Cystine arylamidase | Trypsin | α-chymotrypsin | Acid phosphatase | Naphthol-AS-BI-phosphohydrolase | α-galactosidase | β-Galactosidase | α-Glucosidase | β-Glucosidase | N-acetyl-β-Glucosaminidase | α-Mannosidase | α-Fucosidase |  |  |  |
| PL-1      |                         |          |          |          |           |            |           |            |                           |                     |                        |         |           |           |                    |             |        |          |         |            |            |                           |                           |                      |                |                       |               |                     |                    |                     |         |                |                  |                                 |                 |                 |               |               |                            |               |              |  |  |  |
| PL-2      |                         |          |          |          |           |            |           |            |                           |                     |                        |         |           |           |                    |             |        |          |         |            |            |                           |                           |                      |                |                       |               |                     |                    |                     |         |                |                  |                                 |                 |                 |               |               |                            |               |              |  |  |  |
| PL-3      |                         |          |          |          |           |            |           |            |                           |                     |                        |         |           |           |                    |             |        |          |         |            |            |                           |                           |                      |                |                       |               |                     |                    |                     |         |                |                  |                                 |                 |                 |               |               |                            |               |              |  |  |  |
| PL-4      |                         |          |          |          |           |            |           |            |                           |                     |                        |         |           |           |                    |             |        |          |         |            |            |                           |                           |                      |                |                       |               |                     |                    |                     |         |                |                  |                                 |                 |                 |               |               |                            |               |              |  |  |  |
| PL-5      |                         |          |          |          |           |            |           |            |                           |                     |                        |         |           |           |                    |             |        |          |         |            |            |                           |                           |                      |                |                       |               |                     |                    |                     |         |                |                  |                                 |                 |                 |               |               |                            |               |              |  |  |  |
| PL-6      |                         |          |          |          |           |            |           |            |                           |                     |                        |         |           |           |                    |             |        |          |         |            |            |                           |                           |                      |                |                       |               |                     |                    |                     |         |                |                  |                                 |                 |                 |               |               |                            |               |              |  |  |  |
| PL-7      |                         |          |          |          |           |            |           |            |                           |                     |                        |         |           |           |                    |             |        |          |         |            |            |                           |                           |                      |                |                       |               |                     |                    |                     |         |                |                  |                                 |                 |                 |               |               |                            |               |              |  |  |  |
| PL-8      |                         |          |          |          |           |            |           |            |                           |                     |                        |         |           |           |                    |             |        |          |         |            |            |                           |                           |                      |                |                       |               |                     |                    |                     |         |                |                  |                                 |                 |                 |               |               |                            |               |              |  |  |  |
| PL-9      |                         |          |          |          |           |            |           |            |                           |                     |                        |         |           |           |                    |             |        |          |         |            |            |                           |                           |                      |                |                       |               |                     |                    |                     |         |                |                  |                                 |                 |                 |               |               |                            |               |              |  |  |  |
| PL-10     |                         |          |          |          |           |            |           |            |                           |                     |                        |         |           |           |                    |             |        |          |         |            |            |                           |                           |                      |                |                       |               |                     |                    |                     |         |                |                  |                                 |                 |                 |               |               |                            |               |              |  |  |  |
| PL-11     |                         |          |          |          |           |            |           |            |                           |                     |                        |         |           |           |                    |             |        |          |         |            |            |                           |                           |                      |                |                       |               |                     |                    |                     |         |                |                  |                                 |                 |                 |               |               |                            |               |              |  |  |  |
| PL-12     |                         |          |          |          |           |            |           |            |                           |                     |                        |         |           |           |                    |             |        |          |         |            |            |                           |                           |                      |                |                       |               |                     |                    |                     |         |                |                  |                                 |                 |                 |               |               |                            |               |              |  |  |  |
| PL-13     |                         |          |          |          |           |            |           |            |                           |                     |                        |         |           |           |                    |             |        |          |         |            |            |                           |                           |                      |                |                       |               |                     |                    |                     |         |                |                  |                                 |                 |                 |               |               |                            |               |              |  |  |  |
| PL-14     |                         |          |          |          |           |            |           |            |                           |                     |                        |         |           |           |                    |             |        |          |         |            |            |                           |                           |                      |                |                       |               |                     |                    |                     |         |                |                  |                                 |                 |                 |               |               |                            |               |              |  |  |  |
| PL-15     |                         |          |          |          |           |            |           |            |                           |                     |                        |         |           |           |                    |             |        |          |         |            |            |                           |                           |                      |                |                       |               |                     |                    |                     |         |                |                  |                                 |                 |                 |               |               |                            |               |              |  |  |  |
| PL-16     |                         |          |          |          |           |            |           |            |                           |                     |                        |         |           |           |                    |             |        |          |         |            |            |                           |                           |                      |                |                       |               |                     |                    |                     |         |                |                  |                                 |                 |                 |               |               |                            |               |              |  |  |  |
| PL-17     |                         |          |          |          |           |            |           |            |                           |                     |                        |         |           |           |                    |             |        |          |         |            |            |                           |                           |                      |                |                       |               |                     |                    |                     |         |                |                  |                                 |                 |                 |               |               |                            |               |              |  |  |  |
| PL-18     |                         |          |          |          |           |            |           |            |                           |                     |                        |         |           |           |                    |             |        |          |         |            |            |                           |                           |                      |                |                       |               |                     |                    |                     |         |                |                  |                                 |                 |                 |               |               |                            |               |              |  |  |  |
| PL-19     |                         |          |          |          |           |            |           |            |                           |                     |                        |         |           |           |                    |             |        |          |         |            |            |                           |                           |                      |                |                       |               |                     |                    |                     |         |                |                  |                                 |                 |                 |               |               |                            |               |              |  |  |  |
| PL-20     |                         |          |          |          |           |            |           |            |                           |                     |                        |         |           |           |                    |             |        |          |         |            |            |                           |                           |                      |                |                       |               |                     |                    |                     |         |                |                  |                                 |                 |                 |               |               |                            |               |              |  |  |  |
| PL-21     |                         |          |          |          |           |            |           |            |                           |                     |                        |         |           |           |                    |             |        |          |         |            |            |                           |                           |                      |                |                       |               |                     |                    |                     |         |                |                  |                                 |                 |                 |               |               |                            |               |              |  |  |  |
| PL-22     |                         |          |          |          |           |            |           |            |                           |                     |                        |         |           |           |                    |             |        |          |         |            |            |                           |                           |                      |                |                       |               |                     |                    |                     |         |                |                  |                                 |                 |                 |               |               |                            |               |              |  |  |  |
| PL-23     |                         |          |          |          |           |            |           |            |                           |                     |                        |         |           |           |                    |             |        |          |         |            |            |                           |                           |                      |                |                       |               |                     |                    |                     |         |                |                  |                                 |                 |                 |               |               |                            |               |              |  |  |  |
| PL-24     |                         |          |          |          |           |            |           |            |                           |                     |                        |         |           |           |                    |             |        |          |         |            |            |                           |                           |                      |                |                       |               |                     |                    |                     |         |                |                  |                                 |                 |                 |               |               |                            |               |              |  |  |  |
| PL-25     |                         |          |          |          |           |            |           |            |                           |                     |                        |         |           |           |                    |             |        |          |         |            |            |                           |                           |                      |                |                       |               |                     |                    |                     |         |                |                  |                                 |                 |                 |               |               |                            |               |              |  |  |  |
| PL-26     |                         |          |          |          |           |            |           |            |                           |                     |                        |         |           |           |                    |             |        |          |         |            |            |                           |                           |                      |                |                       |               |                     |                    |                     |         |                |                  |                                 |                 |                 |               |               |                            |               |              |  |  |  |
| PL-27     |                         |          |          |          |           |            |           |            |                           |                     |                        |         |           |           |                    |             |        |          |         |            |            |                           |                           |                      |                |                       |               |                     |                    |                     |         |                |                  |                                 |                 |                 |               |               |                            |               |              |  |  |  |
| PL-28     |                         |          |          |          |           |            |           |            |                           |                     |                        |         |           |           |                    |             |        |          |         |            |            |                           |                           |                      |                |                       |               |                     |                    |                     |         |                |                  |                                 |                 |                 |               |               |                            |               |              |  |  |  |
| PL-29     |                         |          |          |          |           |            |           |            |                           |                     |                        |         |           |           |                    |             |        |          |         |            |            |                           |                           |                      |                |                       |               |                     |                    |                     |         |                |                  |                                 |                 |                 |               |               |                            |               |              |  |  |  |
| PL-30     |                         |          |          |          |           |            |           |            |                           |                     |                        |         |           |           |                    |             |        |          |         |            |            |                           |                           |                      |                |                       |               |                     |                    |                     |         |                |                  |                                 |                 |                 |               |               |                            |               |              |  |  |  |
| PL-31     |                         |          |          |          |           |            |           |            |                           |                     |                        |         |           |           |                    |             |        |          |         |            |            |                           |                           |                      |                |                       |               |                     |                    |                     |         |                |                  |                                 |                 |                 |               |               |                            |               |              |  |  |  |
| PL-32     |                         |          |          |          |           |            |           |            |                           |                     |                        |         |           |           |                    |             |        |          |         |            |            |                           |                           |                      |                |                       |               |                     |                    |                     |         |                |                  |                                 |                 |                 |               |               |                            |               |              |  |  |  |
| PL-33     |                         |          |          |          |           |            |           |            |                           |                     |                        |         |           |           |                    |             |        |          |         |            |            |                           |                           |                      |                |                       |               |                     |                    |                     |         |                |                  |                                 |                 |                 |               |               |                            |               |              |  |  |  |
| ATCC9545  |                         |          |          |          |           |            |           |            |                           |                     |                        |         |           |           |                    |             |        |          |         |            |            |                           |                           |                      |                |                       |               |                     |                    |                     |         |                |                  |                                 |                 |                 |               |               |                            |               |              |  |  |  |
| ATCC49843 |                         |          |          |          |           |            |           |            |                           |                     |                        |         |           |           |                    |             |        |          |         |            |            |                           |                           |                      |                |                       |               |                     |                    |                     |         |                |                  |                                 |                 |                 |               |               |                            |               |              |  |  |  |
| 233/00    |                         |          |          |          |           |            |           |            |                           |                     |                        |         |           |           |                    |             |        |          |         |            |            |                           |                           |                      |                |                       |               |                     |                    |                     |         |                |                  |                                 |                 |                 |               |               |                            |               |              |  |  |  |
| LMG16248  |                         |          |          |          |           |            |           |            |                           |                     |                        |         |           |           |                    |             |        |          |         |            |            |                           |                           |                      |                |                       |               |                     |                    |                     |         |                |                  |                                 |                 |                 |               |               |                            |               |              |  |  |  |
| LMG16252  |                         |          |          |          |           |            |           |            |                           |                     |                        |         |           |           |                    |             |        |          |         |            |            |                           |                           |                      |                |                       |               |                     |                    |                     |         |                |                  |                                 |                 |                 |               |               |                            |               |              |  |  |  |

## API testing systems

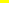 API® 50 CH

 API® ZYM
